# Supplementary figures and images for: Prediction and Experimental Verification of a Hierarchical Transcription Factor Regulatory Network of Porcine Myoglobin (Mb)
Source: MDPI journal article supplement (doi:10.3390/ani11123599), 2021-12-19

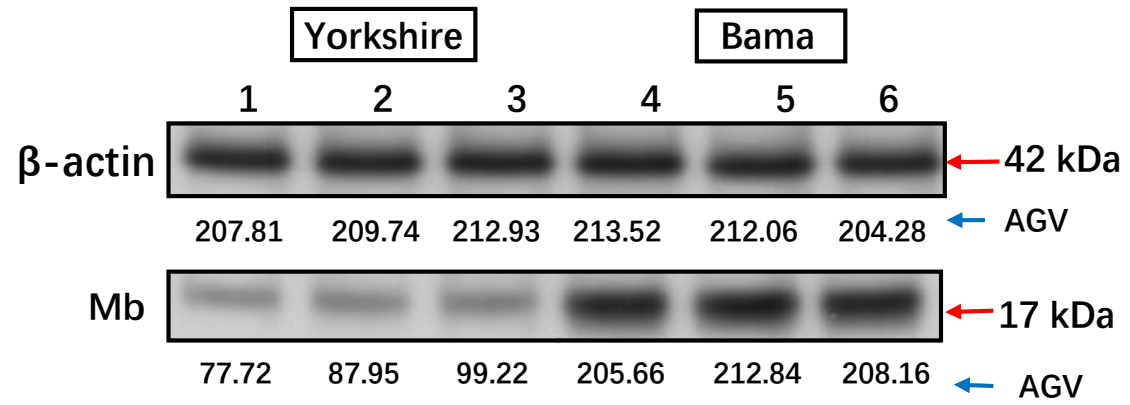

Average Gray Value : AGV

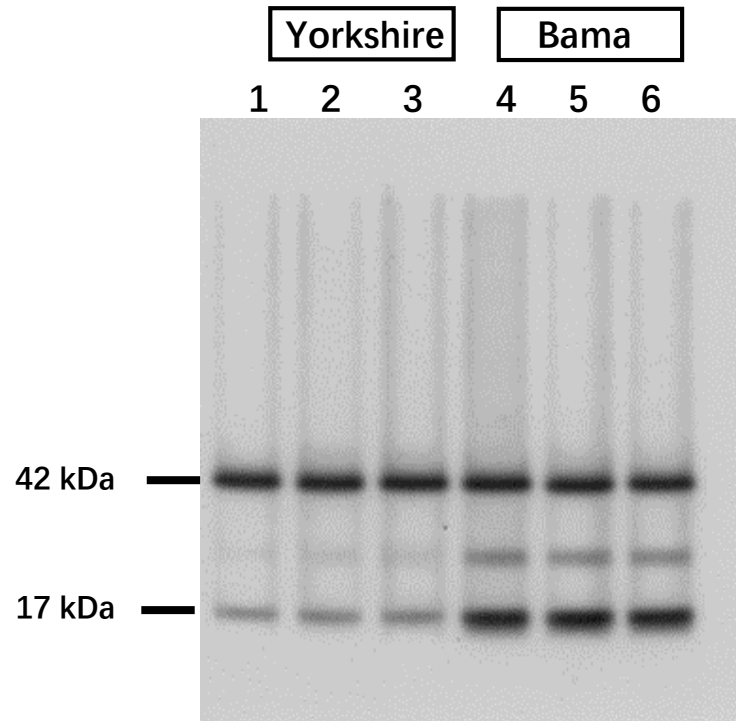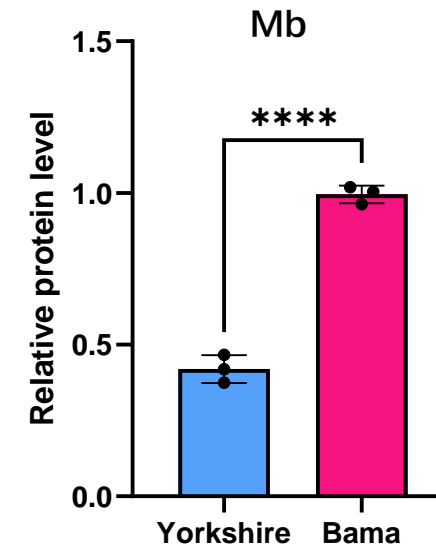

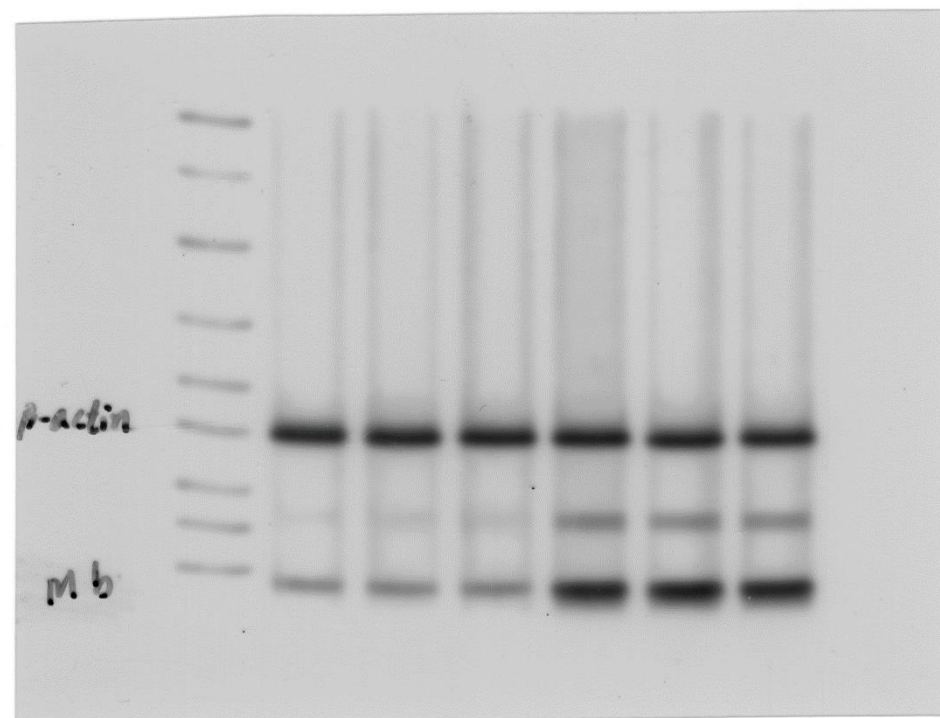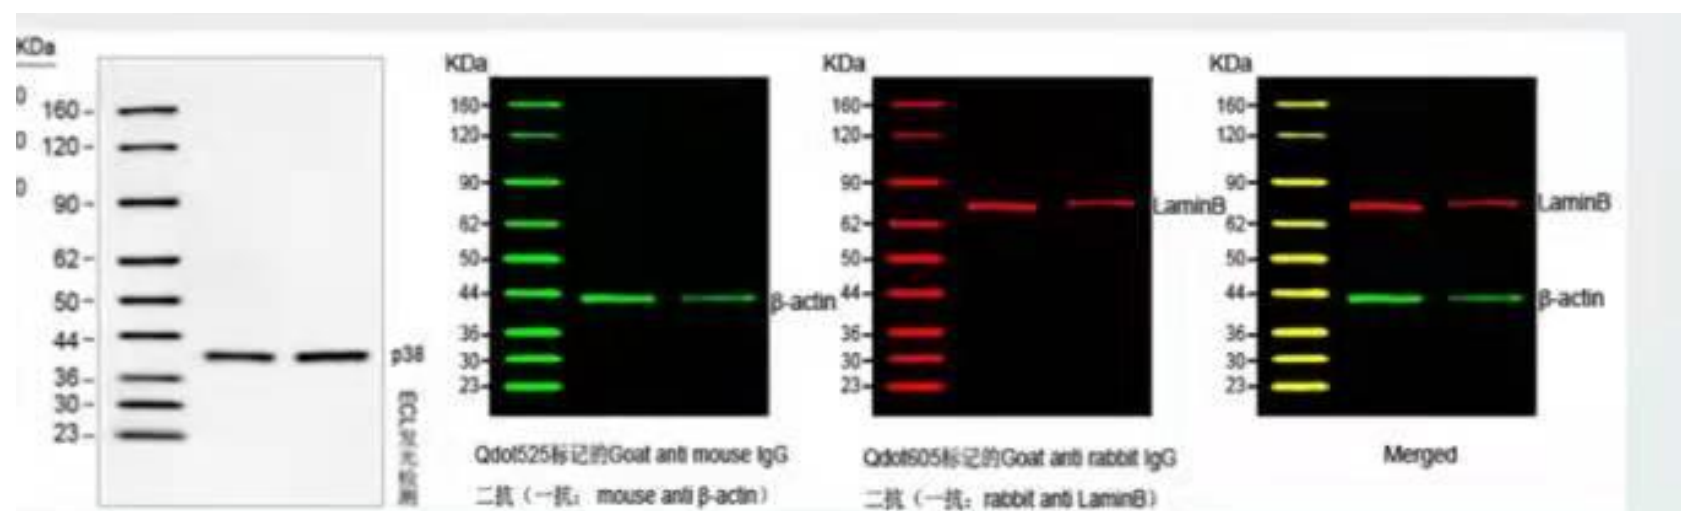

Supplement: s1 [file s1]
